# Supplementary material for: Tandem Mass Tagging Based Identification of Proteome Signatures for Reductive Stress Cardiomyopathy
Source: PubMed Central journal article supplement (PMC9234166; doi:10.3389/fcvm.2022.848045), 2022-06-13

Supplemental Figure 2

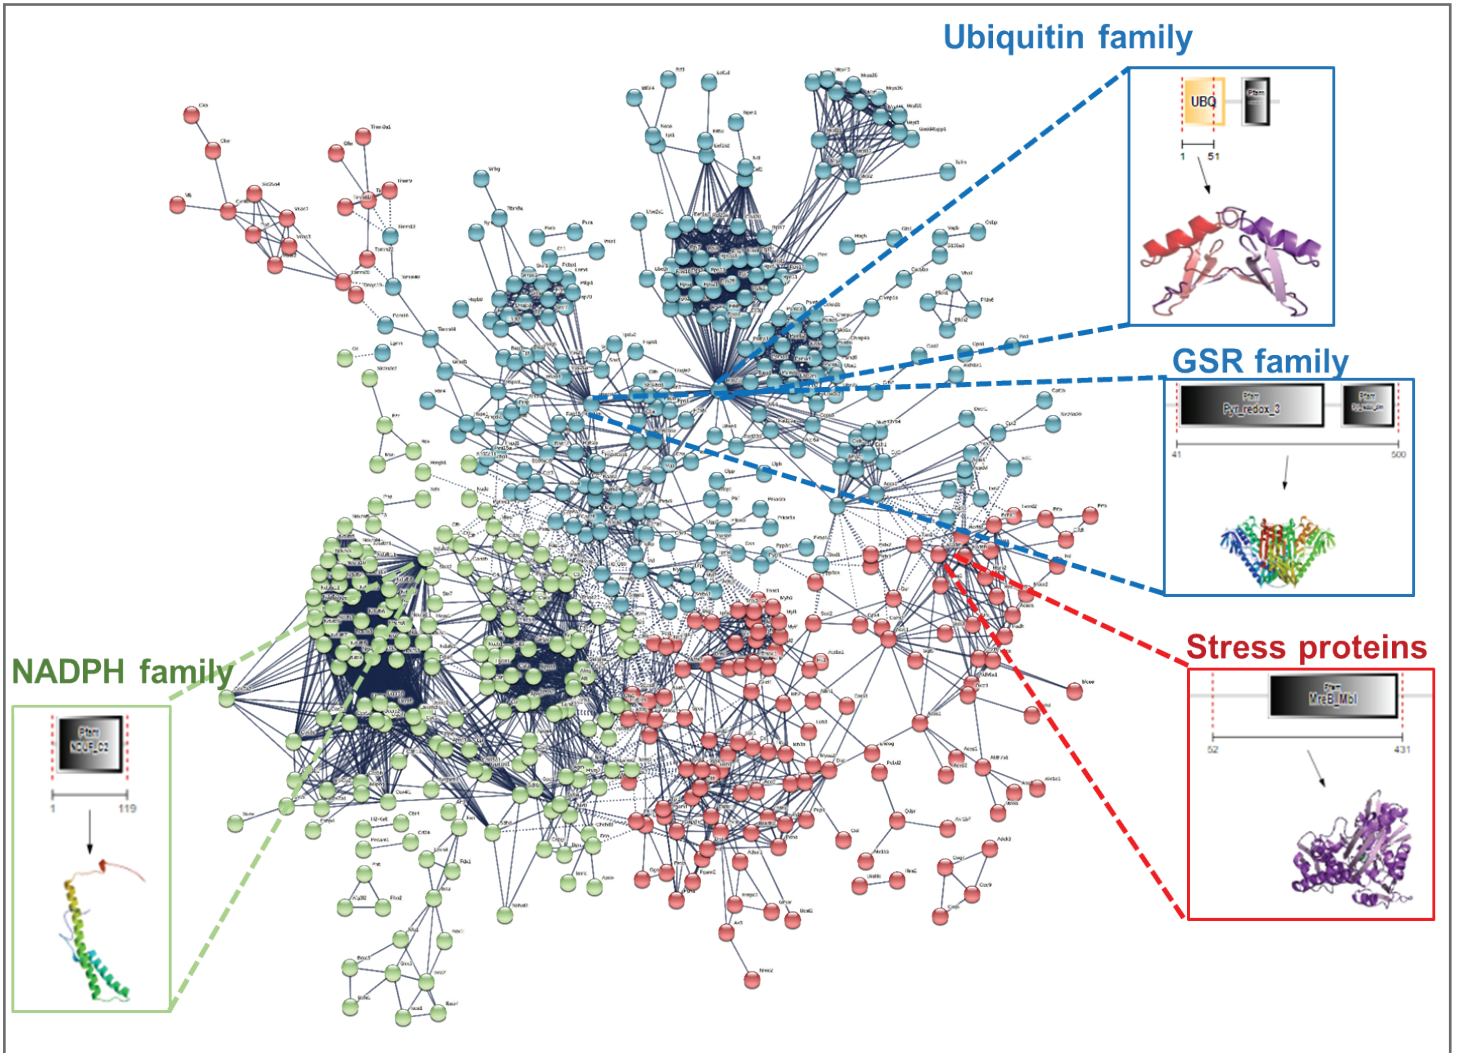

Supplement: Image_2.pdf [file Image_2.pdf]
