# Supplementary material for: Tandem Mass Tagging Based Identification of Proteome Signatures for Reductive Stress Cardiomyopathy
Source: Front Cardiovasc Med. 2022 Jun 13;9:848045. doi: 10.3389/fcvm.2022.848045 (PMC9234166; doi:10.3389/fcvm.2022.848045)
Supplement: Supplementary file 2 [file Image_1.pdf]

A

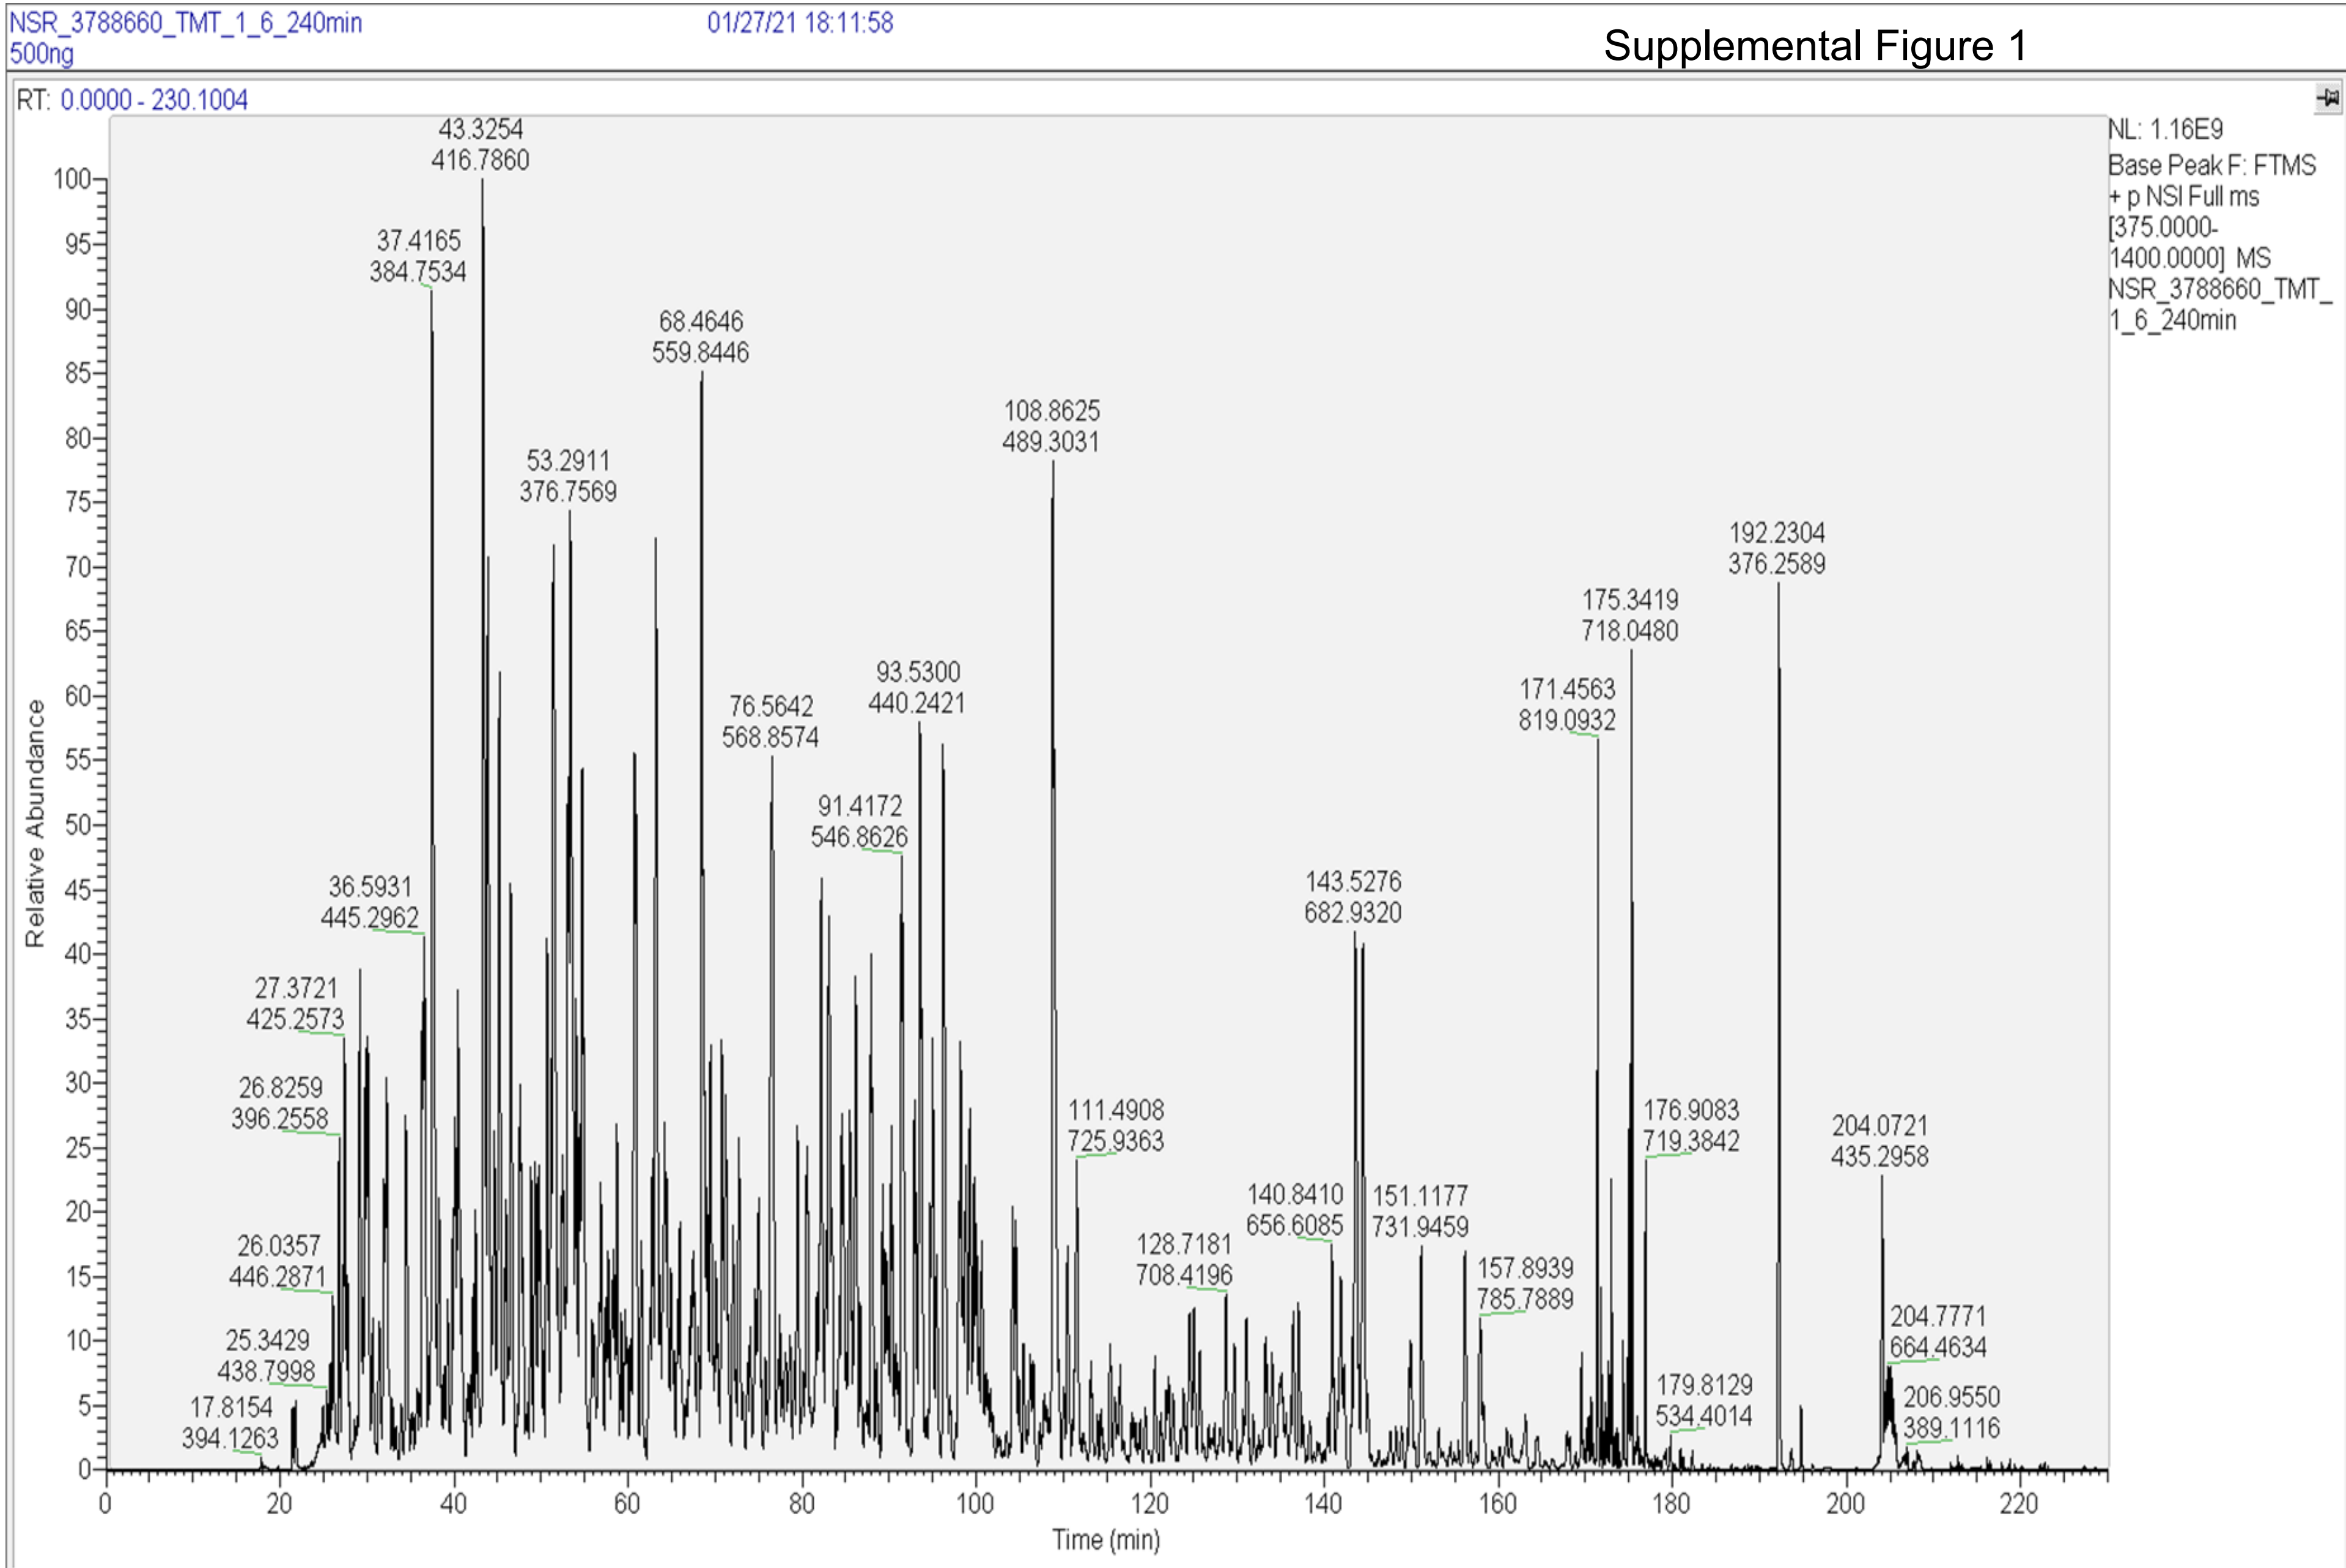

B

| Experiment Methods                          |                                                                              |
|---------------------------------------------|------------------------------------------------------------------------------|
| Parameter                                   | Value                                                                        |
| Experiment:                                 | NSR_3788660 (1)                                                              |
| Peak List Generator:                        |                                                                              |
| Version:                                    |                                                                              |
| Charge States Calculated:                   |                                                                              |
| Deisotoped:                                 |                                                                              |
| Textual Annotation:                         |                                                                              |
| Database Set:                               | 1 Database                                                                   |
| Database Name:                              | Contaminants.fasta; Mus_Musculus_Uniprot_Rev_17042_07292020.fasta            |
| Version:                                    |                                                                              |
| Taxonomy:                                   | All Entries                                                                  |
| Number of Proteins:                         | 17263                                                                        |
| Does database contain common contaminants?: |                                                                              |
| Search Engine Set:                          | 1 Search Engine                                                              |
| Search Engine:                              | Sequest                                                                      |
| Version:                                    | IseNode in Proteome Discoverer 2.4.0.305                                     |
| Samples:                                    | All Samples                                                                  |
| Fragment Tolerance:                         | 0.020 Da (Monoisotopic)                                                      |
| Parent Tolerance:                           | 10.0 PPM (Monoisotopic)                                                      |
| Fixed Modifications:                        | +229 on K (TMT6plex)                                                         |
| Variable Modifications:                     | -131 on M (Met-loss), -89 on M (Met-loss+Acetyl), +16 on M (Oxidation), +... |
| Database:                                   | Contaminants.fasta; Mus_Musculus_Uniprot_Rev_17042_07292020.fasta (...)      |
| Digestion Enzyme:                           | Trypsin                                                                      |
| Max Missed Cleavages:                       | 2                                                                            |
| Probability Model:                          |                                                                              |
| NSR_3788660_TMT_1_6_240min_Static:          | Use Previously Calculated Probability (No analysis) [all charge states]      |
| NSR_3788660_TMT_7_12_240min_Static:         | Use Previously Calculated Probability (No analysis) [all charge states]      |
| Scaffold:                                   | Version: Scaffold_4.11.1                                                     |
| Modification Metadata Set:                  | 2334 modifications                                                           |
| Source:                                     | C:\Program Files\Scaffold 4\parameters\unimod.xml                            |
| Comment:                                    |                                                                              |
| Protein Grouping Strategy:                  | Experiment-wide grouping with protein cluster analysis                       |
| Peptide Thresholds:                         | 95.0% minimum                                                                |
| Protein Thresholds:                         | 95.0% minimum and 2 peptides minimum                                         |
| Peptide FDR:                                | 0.0% (Decoy)                                                                 |
| Protein FDR:                                | 0.1% (Decoy)                                                                 |
| GO Annotation Source(s):                    |                                                                              |
| Pathway Annotation Source(s):               |                                                                              |
| Alternate ID Source(s):                     | FASTA:UniProt/Swiss-Prot Alt. Accession (UniProtKB)                          |

DATABASE SEARCHING-- Tandem mass spectra were extracted by [unknown] version [unknown]. Charge state deconvolution and deisotoping were not performed. All MS/MS samples were analyzed using Sequest (Thermo Fisher Scientific, San Jose, CA, USA; version IseNode in Proteome Discoverer 2.4.0.305). Sequest was set up to search Contaminants.fasta; Mus\_Musculus\_Uniprot\_Rev\_17042\_07292020.fasta (unknown version, 17263 entries) assuming the digestion enzyme trypsin. Sequest was searched with a fragment ion mass tolerance of 0.020 Da and a parent ion tolerance of 10.0 PPM. TMT6plex of lysine was specified in Sequest as a fixed modification. Met-loss of methionine, met-loss+Acetyl of methionine, oxidation of methionine, acetyl of the n-terminus and nethylmaleimide of cysteine were specified in Sequest as variable modifications.

CRITERIA FOR PROTEIN IDENTIFICATION-- Scaffold (version Scaffold\_4.11.1, Proteome Software Inc., Portland, OR) was used to validate MS/MS based peptide and protein identifications. Peptide identifications were accepted if they could be established at greater than 95.0% probability by the Percolator posterior error probability calculation (Käll, L et al, Bioinformatics, 24(16):i42-i48, Aug 2008). Protein identifications were accepted if they could be established at greater than 95.0% probability and contained at least 2 identified peptides. Protein probabilities were assigned by the Protein Prophet algorithm (Nesvizhskii, Al et al Anal. Chem. 2003;75(17):4646-58). Proteins that contained similar peptides and could not be differentiated based on MS/MS analysis alone were grouped to satisfy the principles of parsimony. Proteins sharing significant peptide evidence were grouped into clusters.
